# Supplementary material
Source: PubMed Central journal article supplement (PMC6248183)
Supplement: jamaophthalmol-136-1271-s001.pdf [file jamaophthalmol-136-1271-s001.pdf]

## Supplementary Online Content

Zhao PY, Rahmathullah R, Stagg BC, et al. A worldwide price comparison of glaucoma medications, laser trabeculoplasty, and trabeculectomy surgery. *JAMA Ophthalmol*. Published online August 30, 2018. doi:10.1001/jamaophthalmol.2018.3672

**eFigure 1.** Price Ratio of Brand Name Xalatan versus Generic Latanoprost

**eFigure 2.** Cost of Laser Trabeculoplasty as a Percentage of Median Annual Household Income

**eFigure 3.** Price Ratio of Trabeculoplasty versus Latanoprost Therapy

**eFigure 4.** Price Ratio of Trabeculectomy versus Latanoprost + Timolol Therapy

**eTable.** List of data sources arranged by country

This supplementary material has been provided by the authors to give readers additional information about their work.

**eFigure 1.** Price Ratio of Brand Name Xalatan versus Generic Latanoprost

In countries with pricing data available for brand name latanoprost (Xalatan) and generic latanoprost, the price of Xalatan was divided by the price of generic latanoprost.

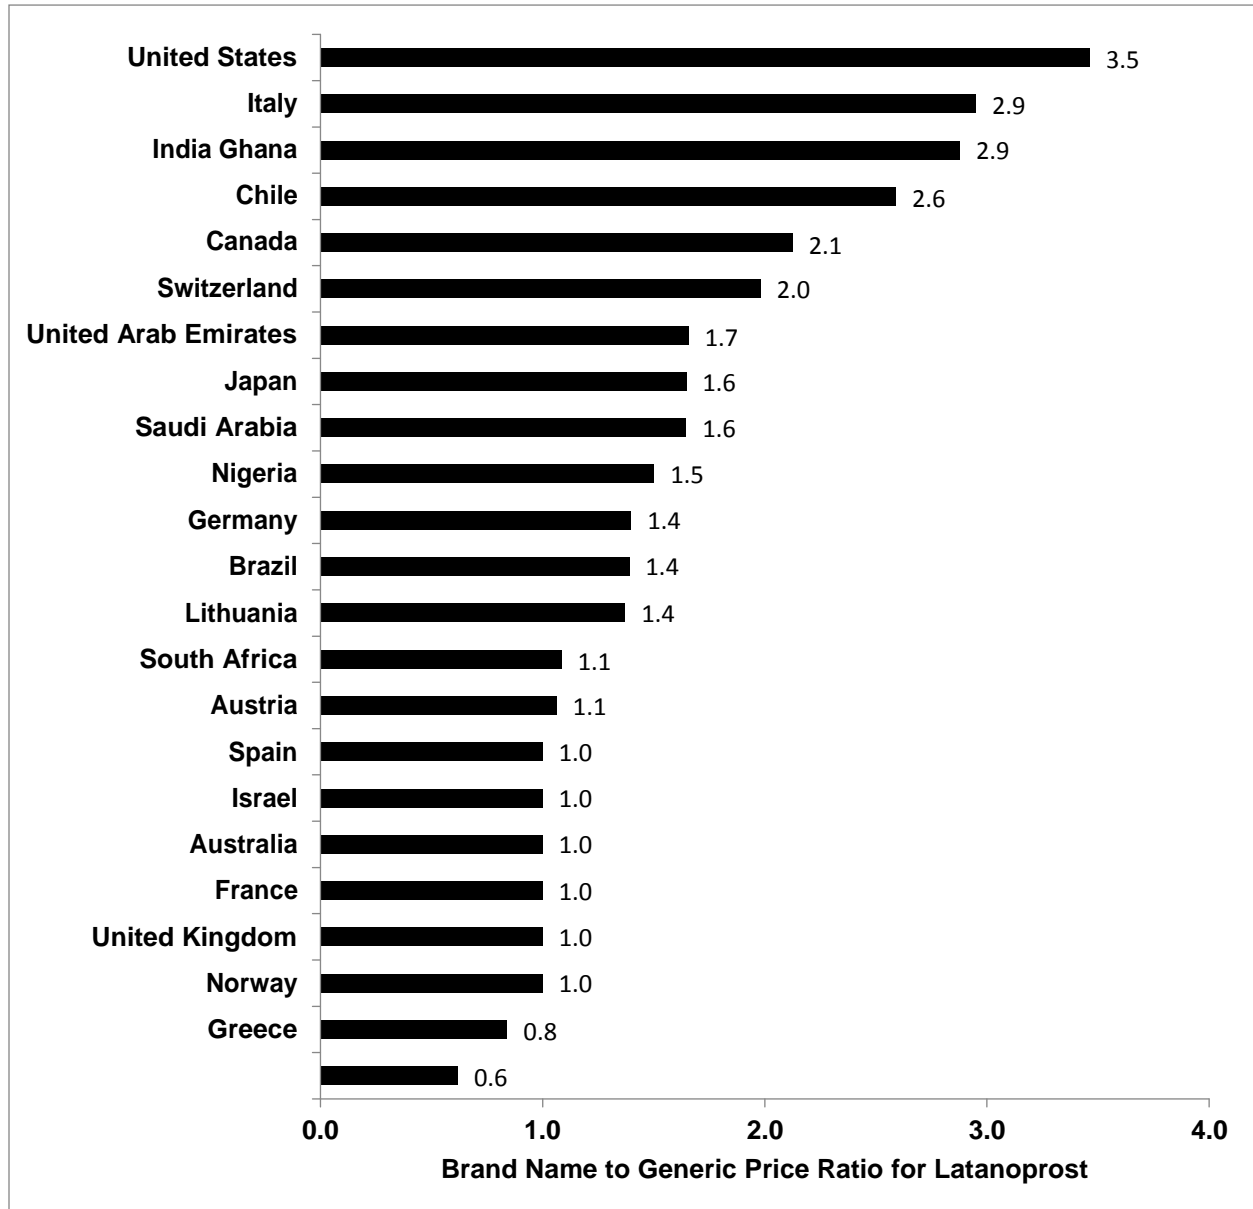

**eFigure 2.** Cost of Laser Trabeculoplasty as a Percentage of Median Annual Household Income

Prices for laser trabeculoplasty were divided by the median annual household income in each country and expressed as a percentage. Data not available for Guatemala, United Arab Emirates, and Qatar.

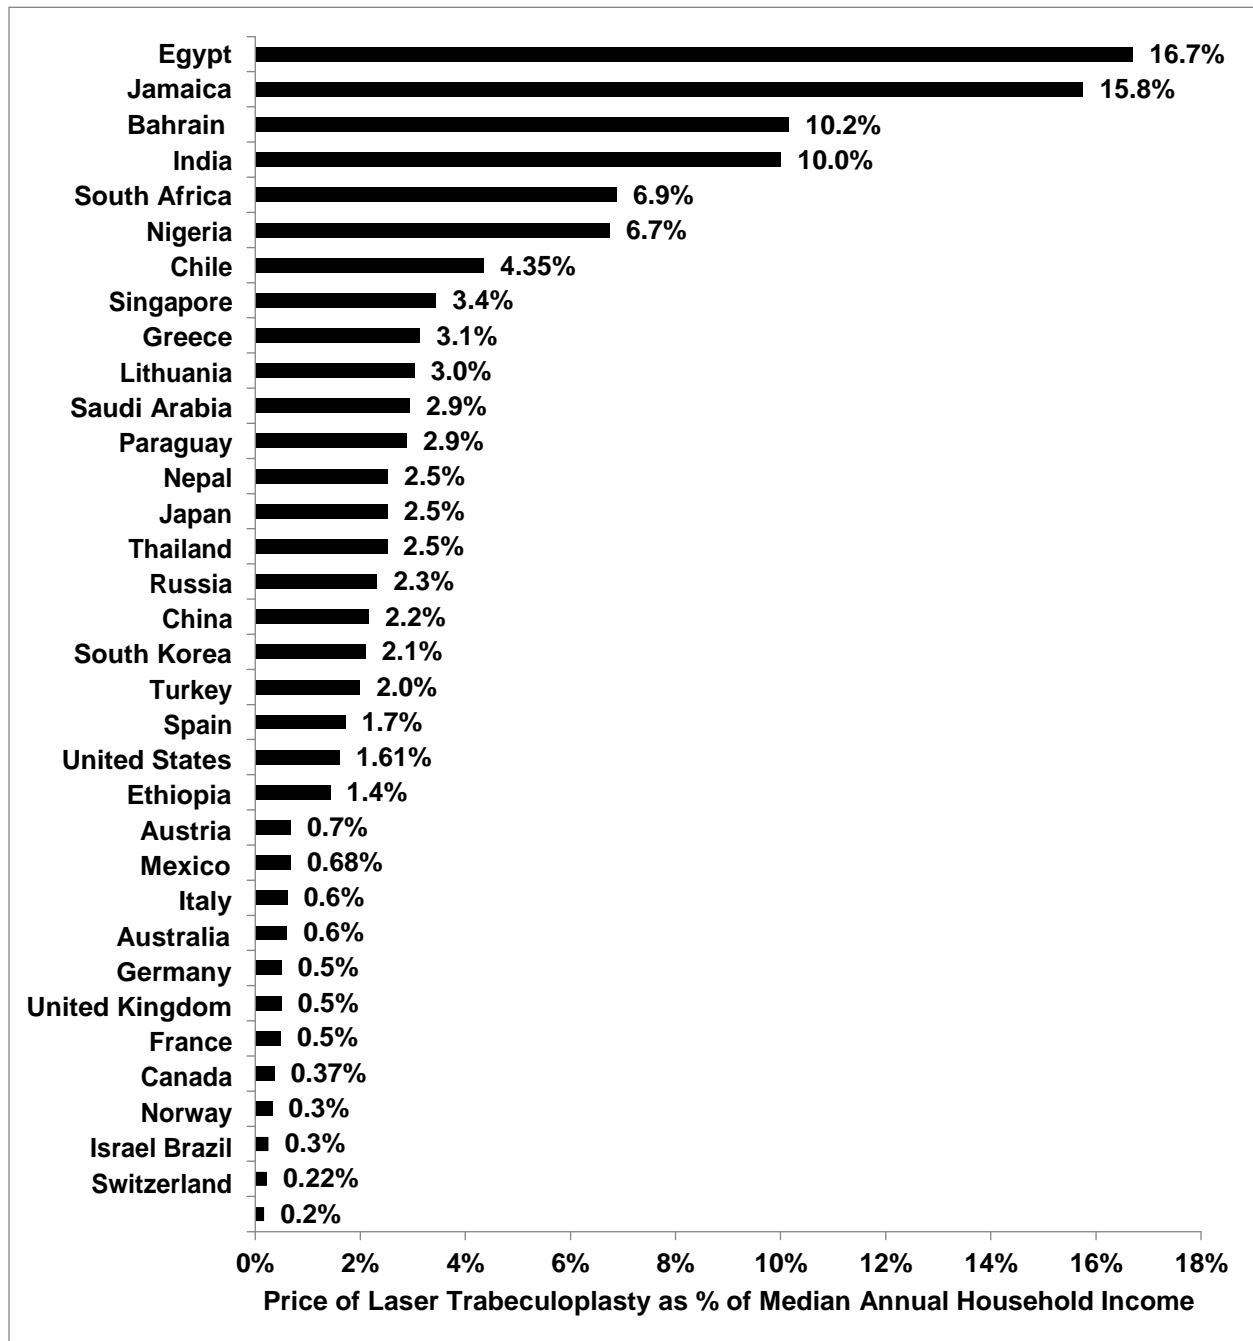

Prices are reported as individually charged laser procedures per eye.

**eFigure 3.** Price Ratio of Trabeculoplasty versus Latanoprost Therapy

Prices were computed for bilateral laser trabeculoplasty procedures and divided by prices for a three-year supply of generic (or brand name if generic not available) latanoprost therapy to obtain cost ratios for each country.

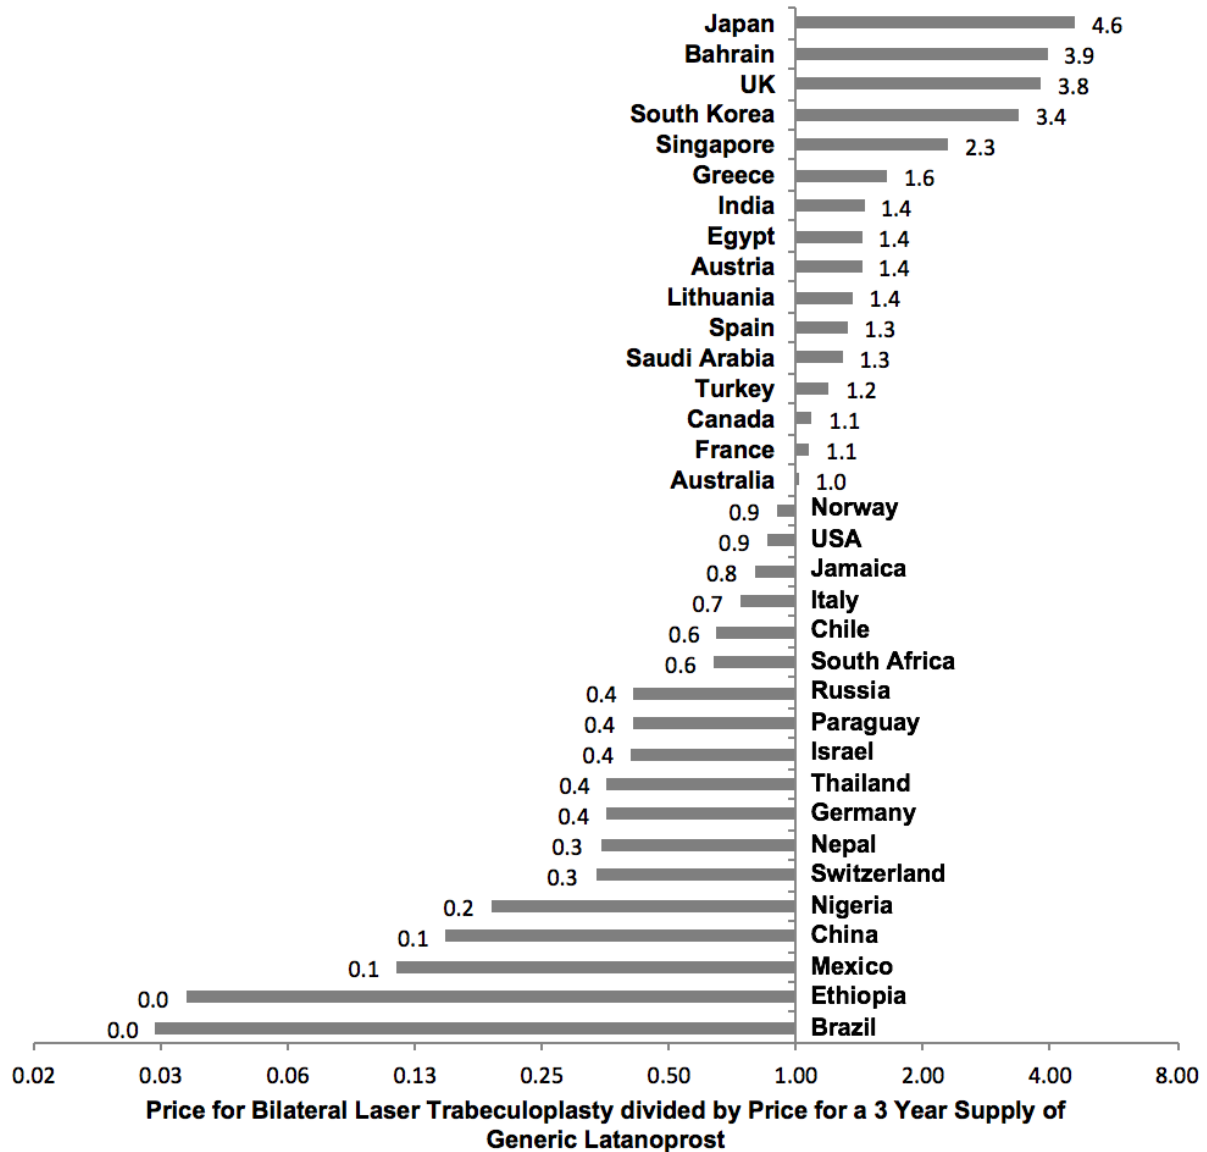

**eFigure 4.** Price Ratio of Trabeculectomy versus Latanoprost + Timolol Therapy Prices

These prices were computed for bilateral trabeculectomy procedures and divided by prices for a three-year supply of generic (or brand name if generic not available) latanoprost + generic timolol therapy to obtain cost ratios for each country.

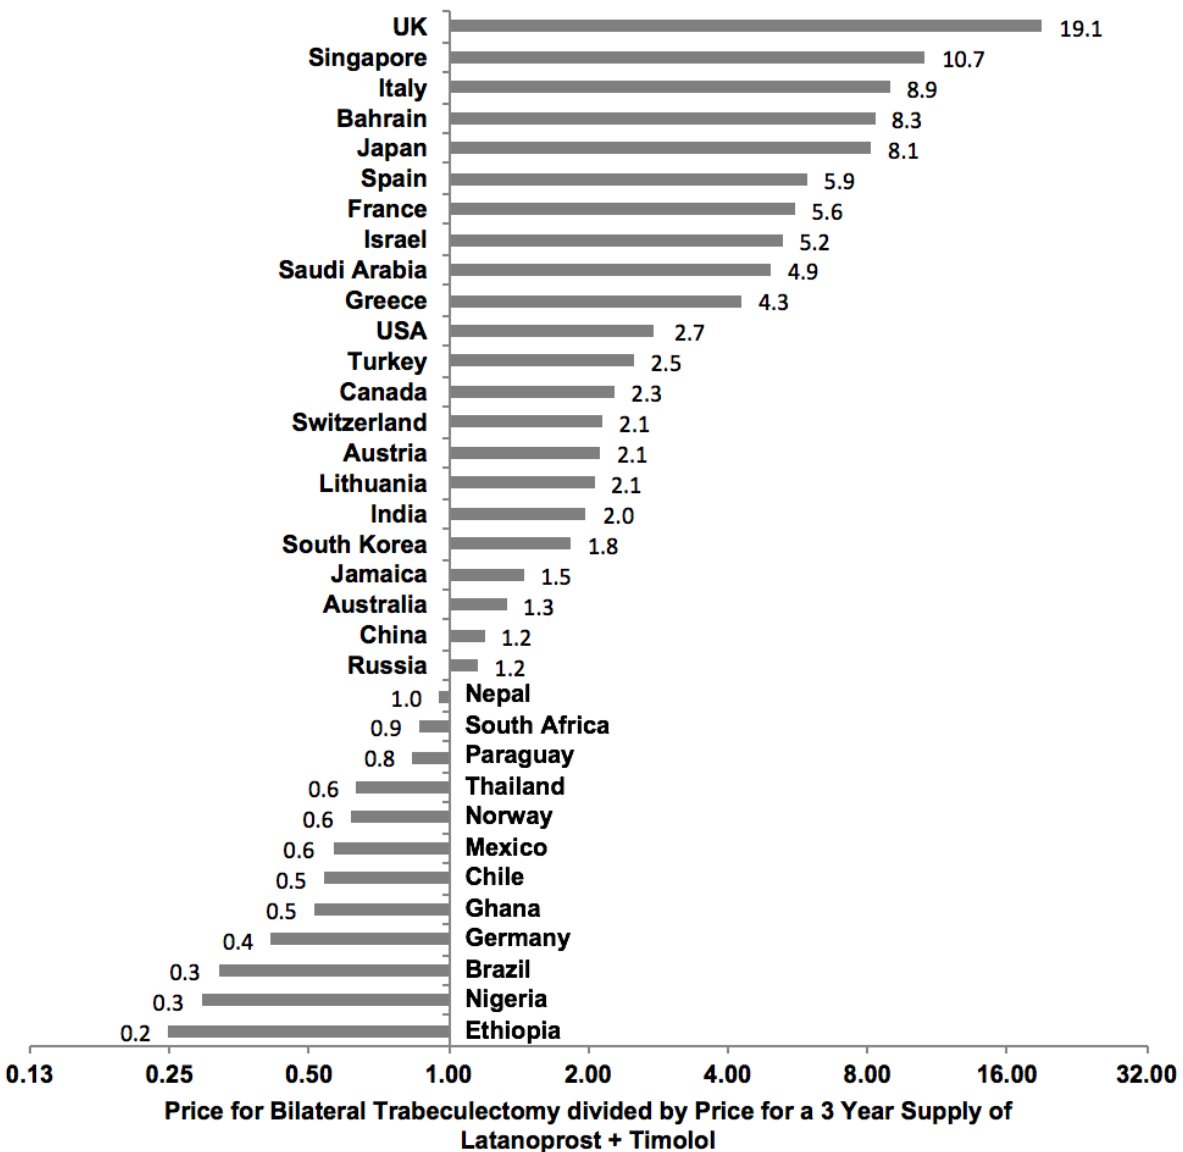

**eTable.** List of data sources arranged by country

| <b>Country</b>       | <b>Source of Medication Data</b>                          | <b>Source of Procedure Data</b>                        |
|----------------------|-----------------------------------------------------------|--------------------------------------------------------|
| USA                  | RED BOOK Online                                           | CMS Physician Fee Schedule                             |
| Canada (Ontario)     | Ontario Drug Benefit Formulary                            | Ontario Schedule of Benefits                           |
| Canada (Quebec)      | Quebec List of Medications                                | Billing Manual of Medical Specialists                  |
| Mexico               | Publication: Topical glaucoma cost in Mexico              | Tabulador de cuotas de recuperación                    |
| Guatemala            | Personal Communication                                    | Personal Communication                                 |
| Brazil               | Drug Price Lists                                          | Unified Table of Procedures                            |
| Chile                | Personal Communication                                    | Personal Communication                                 |
| Paraguay             | Personal Communication                                    | Personal Communication                                 |
| U.K.                 | British National Formulary                                | National Tariff Payment System                         |
| France               | Public Database of Medications                            | T2A Pricing Activity Tariff List                       |
| Spain                | Price List of Prescription Drugs, Personal Communication  | Personal Communication                                 |
| Switzerland          | Personal Communication                                    | Personal Communication                                 |
| Austria              | Personal Communication                                    | Personal Communication                                 |
| Lithuania            | Compensated Medicinal Price List                          | Personal Communication                                 |
| Nigeria              | Publication, personal communication                       | Publication, personal communication                    |
| Ethiopia             | Personal Communication                                    | Personal Communication                                 |
| South Africa         | South African Medicine Price Registry                     | Government Gazette                                     |
| Israel               | Price List of Prescription Drugs                          | Price List for Ambulatory and Hospitalization Services |
| China                | Personal Communications                                   | Personal Communications                                |
| Nepal                | Personal Communication                                    | Personal Communication                                 |
| Japan                | Drug Price Standards                                      | Medical Fees                                           |
| Thailand             | Personal Communication                                    | Personal Communication                                 |
| India                | Personal Communications                                   | Personal Communications                                |
| Australia            | Australia Pharmaceutical Benefits Scheme                  | Australian Medicare Benefits Schedule                  |
| Singapore            | Personal Communication                                    | Personal Communication                                 |
| Italy                | Personal Communication                                    | Personal Communication                                 |
| Jamaica              | Personal Communication                                    | Personal Communication                                 |
| Russia               | Personal Communication                                    | Personal Communication                                 |
| Ghana                | Personal Communication                                    | Personal Communication                                 |
| South Korea          | Personal Communication                                    | Personal Communication                                 |
| Turkey               | Personal Communications                                   | Personal Communications                                |
| Saudi Arabia         | Personal Communication                                    | Personal Communication                                 |
| Bahrain              | Personal Communication                                    | Personal Communication                                 |
| Norway               | Drug Pricing Database                                     | Personal Communication                                 |
| Egypt                | Personal Communication                                    | Personal Communication                                 |
| Greece               | Personal Communication                                    | Personal Communication                                 |
| Germany              | German Institute of Medical Documentation and Information | Fee Schedule for Doctors                               |
| United Arab Emirates | Personal Communication                                    | Personal Communication                                 |
| Qatar                | Personal Communication                                    | Personal Communication                                 |

RED BOOK Online via TruVen Health Analytics Micromedex 2.0, available at <https://www.micromedexsolutions.com>, accessed Feb 2016

CMS Physician Fee Schedule, Centers for Medicare & Medicaid Services, available at <https://www.cms.gov/Medicare/Medicare-Fee-for-Service-Payment/PhysicianFeeSched/index.html>, accessed Feb 2016

Ontario Drug Benefit Formulary, Ministry of Health and Long-term Care, available at <https://www.formulary.health.gov.on.ca/formulary/>, accessed Feb 2016

Ontario Schedule of Benefits, Ministry of Health and Long-term Care, available at [http://www.health.gov.on.ca/english/providers/program/ohip/sob/physerv/physerv\\_mn.html](http://www.health.gov.on.ca/english/providers/program/ohip/sob/physerv/physerv_mn.html), accessed Feb 2016

Quebec List of Medications, Régie de l'assurance maladie du Québec, available at <http://www.ramq.gouv.qc.ca/en/regie/legal-publications/Pages/list-medications.aspx>, accessed Feb 2016

Manuel de facturation des médecins spécialistes, Régie de l'assurance maladie du Québec, available at <http://www.ramq.gouv.qc.ca/fr/professionnels/medecins-specialistes/manuels/Pages/facturation.aspx>, accessed Feb 2016

Lazcano-Gomez G, Hernandez-Oteyza A, et al (2014). Topical glaucoma cost in Mexico. *Int Ophthalmol* 34(2), 241-249.

Gaceta Oficial del Distrito Federal, El Secretario de Finanzas, available at [http://www.finanzas.df.gob.mx/transparencia/14/otros/2014/tabulador\\_cobro\\_servicios\\_medicos\\_df.pdf](http://www.finanzas.df.gob.mx/transparencia/14/otros/2014/tabulador_cobro_servicios_medicos_df.pdf), accessed Jun 2016

Tabulador de cuotas de recuperacion, Hospital Civil de Guadalajara, available at [http://www.hcg.udg.mx/LIBs/bajArchivos.php?id=Tabulador\\_cuotas\\_recuperacion\\_2015.pdf](http://www.hcg.udg.mx/LIBs/bajArchivos.php?id=Tabulador_cuotas_recuperacion_2015.pdf), accessed Feb 2016

Personal Communication, Mariano Yee Melgar, Ophthalmologist and Founder, VISUALIZA Clinica de Ojos, Guatemala City, Guatemala, Feb 2016

Listas de preços de medicamentos, Câmara de Regulação do Mercado de Medicamentos, available at <http://portal.anvisa.gov.br/web/cmmed/lista-de-preco-de-medicamentos>, accessed Feb 2016

Tabela unificada de procedimentos e medicamentos do SUS, Ministério da Saúde Brazil, available at <http://sigtap.datasus.gov.br/tabela-unificada/app/sec/inicio.jsp>, accessed Feb 2016

Personal Communication, Fernando Barría von-Bischoffshausen, Ophthalmologist, Hospital Clínico Regional Doctor Guillermo Grant Benavente de Concepción, Concepción, Chile, Feb 2016

Personal Communication, Cristina Sanchez Gauto, Institutional Relationship Manager, Fundacion Vision, Fernando de la Mora, Paraguay, Feb 2016

British National Formulary via MedicinesComplete, available at <https://www.medicinescomplete.com/mc/bnf/current/>, accessed Jun 2016

National Tariff Payment System, National Health Service England, available at <https://www.england.nhs.uk/resources/pay-syst/>, accessed Jun 2016

Base de données publique des médicaments, Ministère des Affaires sociales et de la Santé, available at <http://base-donnees-publique.medicaments.gouv.fr/>, accessed Feb 2016

Classification Commune des Actes Médicaux, L'Assurance Maladie, available at <http://www.ameli.fr/l-assurance-maladie/documentation-technique/t2a-ccam-et-lpp/>, accessed Feb 2016

Tarification à l'activité, L'Assurance Maladie, available at <http://www.ameli.fr/l-assurance-maladie/documentation-technique/t2a-ccam-et-lpp/>, accessed Feb 2016

Informacion actualizada de los precios menores de las nuevas agrupaciones homogeneas Jan 2016, Spanish Ministry of Health, Social Services, and Equality, available at <https://www.msssi.gob.es/profesionales/farmacia/>, accessed Apr 2017

Personal Communication, Antonio Moreno Valladares, Director of Ophthalmology, Hospital Quironsalud Albacete, Albacete, Spain, Apr 2017

Spezialitätenliste, Switzerland Federal Office of Public Health, available at <http://www.spezialitaetenliste.ch/>, accessed Feb 2016

Personal Communication, Marc Töeteberg-Harms, Attending Physician, Department of Ophthalmology, University Hospital Zurich, Zurich, Switzerland, Feb 2016

Personal Communication, Anton Hommer, Ophthalmologist, Krankenanstalt "Sanatorium Hera", Vienna, Austria, May 2017

Kompensuojamųjų vaistinių preparatų kainynas, Lithuanian Ministry of Health, available at <https://sam.lrv.lt/lt/veiklos-sritys/farmacine-ir-kita-su-tuo-susijusi-veikla/vaistu-ir-medicinos-pagalbos-priemoniu-kompensavimas/kompensuojamuju-vaistiniu-preparatu-kainynas>, accessed Apr 2017

Personal Communication, Ingrida Janulevičienė, Professor, Lithuanian University of Health Sciences, Apr

2017

Omoti AE, Edema OT, Akpe BA, Musa P (2010). Cost analysis of medical versus surgical management of glaucoma in Nigeria. *J Ophthalmic Vis Res* 5(4): 232-239.

Personal Communication, Olufemi Emmanuel Babalola, Professor of Ophthalmology, Bingham University, Jos/Karu, Nigeria, Feb 2016

Personal Communication, Bezawit Tadegagne, Head, Department of Ophthalmology, St. Paul's Hospital Millennium Medical College, Addis Ababa, Ethiopia, Mar 2016

Government Gazette, South Africa Department of Labour, available at

<http://www.labour.gov.za/DOL/downloads/legislation/notices/medical-tariffs/>, accessed Feb 2016

South African Medicine Price Registry, South Africa Department of Health, available at

<http://www.mpr.gov.za/>, accessed Feb 2016

Price List of Prescription Drugs, State of Israel Ministry of Health, available at

<http://www.health.gov.il/Subjects/Finance/DrugPrice/Pages/default.aspx>, accessed Feb 2016

Price List for Ambulatory and Hospitalization Services, State of Israel Ministry of Health, available at

<http://www.health.gov.il/Subjects/Finance/Taarifon/Pages/PriceList.aspx>, accessed Feb 2016

Personal Communication, Hu Cheng, Ophthalmologist, Eye Hospital of Wenzhou Medical College, Wenzhou, Zhejiang Province, China, Feb 2016

Personal Communication, Shaomin Peng, Ophthalmologist, Aier School of Ophthalmology of Central South University, Hunan Province, China, Feb 2016

Personal Communication, Suman S. Thapa, Ophthalmologist, Tilganga Institute of Ophthalmology, Kathmandu, Nepal, Feb 2016

Drug Price Standards, Japan Ministry of Health, Labour, and Welfare, available at

<http://www.mhlw.go.jp/topics/2014/03/tp0305-01.html>, accessed Feb 2016

Medical Fees, Japan Ministry of Health, Labour, and Welfare, available at

<http://www.mhlw.go.jp/stf/seisakunitsuite/bunya/0000038855.html>, accessed Feb 2016

Personal Communication, Kulawan Rojananuangkit, Ophthalmologist, Mettapracharak Watraikhing Hospital, Nakhon Pathom, Thailand, Feb 2016

Personal Communications, Ophthalmologists working in Coimbatore, Madurai, Hyderabad, Chennai, and Delhi, India, Feb 2016

Australian Medicare Benefits Schedule, Australian Government Department of Health, available at

<http://www.mbsonline.gov.au/>, accessed Feb 2016

Pharmaceutical Benefits Scheme, Australian Government Department of Health, available at

<http://www.pbs.gov.au/>, accessed Feb 2016

Personal Communication, Desmond Quek Tung-Lien, Consultant, Glaucoma Service, Singapore National Eye Centre, Singapore, Jun 2016

Personal Communication, Carlo E. Traverso, Ophthalmologist, University of Genoa, Italy, Jun 2016

Personal Communication, Claudine Green-Hemmings, Ophthalmologist, Cornwall Regional Hospital, Jamaica, Jun 2016

Personal Communication, Alina Yurkina, Ophthalmologist, Department of Glaucoma Surgery, S.

Fyodorov Eye Microsurgery State Institution, Moscow, Russia, May 2017

Personal Communication (on international mission to Ghana), Donald L. Budenz, Professor of

Ophthalmology, University of North Carolina, United States, May 2017

Personal Communication, Young Kook Kim, Assistant Professor of Ophthalmology, Seoul National University College of Medicine, South Korea, Aug 2017

Personal Communication, Cem Ozgonul, Ophthalmologist, Van Military Hospital, Van, Turkey, Jul 2017

Personal Communication, Can Kocasarac, Ophthalmologist, Kocaeli Derince Education and Research Hospital, Derince, Turkey, Jul 2017

Personal Communication, Faisal Almobarak, Assistant Professor, Department of Ophthalmology, King Saud University, Saudi Arabia, Jul 2017

Personal Communication, Sammy Basit, Ophthalmologist, Norwegian Ophthalmological Society, Norway, Aug 2017

Pharmaceutical Industry Felleskatalogen, available at <https://www.felleskatalogen.no/>, accessed Aug 2017

Personal Communication, Fathi El Sayyad, Ophthalmologist, El Sayyad Eye Centers, Giza, Egypt, Apr 2017

Personal Communication, Anastasios G.P. Konstas, Professor, Glaucoma Unit, Department of



Ophthalmology, Aristotle University of Thessaloniki, Thessaloniki, Greece, Apr 2017  
Fee Schedule for Physicians, Germany Federal Law Gazette, available at <http://www.e-bis.de/goae/defaultFrame.htm>, accessed Aug 2017  
Drug Reference Prices, German Institute for Medical Documentation and Information, available at <https://www.dimdi.de/static/de/amg/festbeträge-zuzahlung/festbeträge/index.htm>, accessed Aug 2017
